1 **A broadly neutralizing biparatopic Nanobody protects mice from lethal challenge**  
2 **with SARS-CoV-2 variants of concern**

3  
4 Teresa R. Wagner<sup>1,2\*</sup>, Daniel Schnepf<sup>3,4\*</sup>, Julius Beer<sup>3,4\*</sup>, Karin Klingel<sup>5</sup>, Natalia Ruetalo<sup>6</sup>,  
5 Philipp D. Kaiser<sup>2</sup>, Daniel Junker<sup>2</sup>, Martina Sauter<sup>5</sup>, Bjoern Traenkle<sup>2</sup>, Desiree I. Frecot<sup>1,2</sup>,  
6 Matthias Becker<sup>2</sup>, Nicole Schneiderhan-Marra<sup>2</sup>, Annette Ohnemus<sup>3,4</sup>, Martin Schwemmle<sup>3,4</sup>,  
7 Michael Schindler<sup>6</sup>, Ulrich Rothbauer<sup>1,2,7#</sup>

8  
9 Addresses

10 <sup>1</sup> Pharmaceutical Biotechnology, Eberhard Karls University, Tübingen, Germany

11 <sup>2</sup> NMI Natural and Medical Sciences Institute at the University of Tübingen, in Reutlingen,  
12 Germany

13 <sup>3</sup> Institute of Virology, Medical Center University Freiburg, Freiburg, Germany

14 <sup>4</sup> Faculty of Medicine, University of Freiburg, Freiburg, Germany

15 <sup>5</sup> Institute for Pathology and Neuropathology, University Hospital Tübingen, Tübingen,  
16 Germany

17 <sup>6</sup> Institute for Medical Virology and Epidemiology of Viral Diseases, University Hospital  
18 Tübingen, Tübingen, Germany

19 <sup>7</sup> Cluster of Excellence iFIT (EXC2180) “Image-Guided and Functionally Instructed Tumor  
20 Therapies”, Eberhard Karls University, Tübingen, Germany

21  
22 \* authors contributed equally to this work

23 # corresponding author

24  
25 Correspondence:

26 Prof. Dr. Ulrich Rothbauer, NMI Natural and Medical Sciences Institute at the University of  
27 Tübingen

28 Markwiesenstr. 55, 72770 Reutlingen, Germany.

29 E-mail: [ulrich.rothbauer@uni-tuebingen.de](mailto:ulrich.rothbauer@uni-tuebingen.de)

30 Phone: +49 7121 51530-415

31 Fax: +49 7121 51530-816

32 Orcid ID: 0000-0001-5923-8986

33

34 **Abstract**

35 The ongoing COVID-19 pandemic and the frequent emergence of new SARS-CoV-2 variants  
36 of concern (VOCs), requires continued development of fast and effective therapeutics.  
37 Recently, we identified high-affinity neutralizing nanobodies (Nb) specific for the receptor-  
38 binding domain (RBD) of SARS-CoV-2, which are now being used as biparatopic Nbs (bipNbs)  
39 to investigate their potential as future drug candidates. Following detailed *in vitro*  
40 characterization, we chose NM1267 as the most promising candidate showing high affinity  
41 binding to several recently described SARS-CoV-2 VOCs and strong neutralizing capacity  
42 against a patient isolate of B.1.351 (Beta). To assess if bipNb NM1267 confers protection  
43 against SARS-CoV-2 infection *in vivo*, human ACE2 transgenic mice were treated by  
44 intranasal route before infection with a lethal dose of SARS-CoV-2. NM1267-treated mice  
45 showed significantly reduced disease progression, increased survival rates and secreted less  
46 infectious virus via their nostrils. Histopathological analyses and *in situ* hybridization further  
47 revealed a drastically reduced viral load and inflammatory response in lungs of NM1267-  
48 treated mice. These data suggest, that bipNb NM1267 is a broadly active and easily applicable  
49 drug candidate against a variety of emerging SARS-CoV-2 VOCs.

50

51 **Keywords:** SARS-CoV-2; variants of concern; neutralizing nanobodies; therapeutics, mouse;  
52 passive immunization

53

## 54 **Introduction**

55 The ongoing SARS-CoV-2 pandemic continues to be challenging due to limited access to  
56 vaccines in certain countries or vaccine fatigue in others, the lack of effective and easy-to-  
57 administer antivirals, and the emergence of variants of concern (VOCs) (Scudellari, 2020).  
58 Despite the rapid development of effective vaccines, global immunity or alternatively  
59 eradication of SARS-CoV-2 is currently out of reach (Dagan *et al*, 2021; Kwok *et al*, 2020). In  
60 addition, vaccination does not confer sterile immunity against SARS-CoV-2 infection and  
61 especially in the elderly, immunocompromised individuals, or individuals with severe  
62 preexisting conditions; breakthrough infections can still develop into life-threatening disease  
63 (Beaudoin-Bussi eres *et al*, 2020; Kustin *et al*, 2021; Long *et al*, 2020). In particular, some  
64 SARS-CoV-2 variants with increased transmissibility and pathogenicity accompanied by a  
65 partial immune escape were reported to cause severe disease progression even in vaccinated  
66 individuals (Becker *et al*, 2021; Challen *et al*, 2021; Davies *et al*, 2021a; Davies *et al*, 2021b;  
67 Jewell, 2021; Madhi *et al*, 2021; Volz *et al*, 2021; Zhou *et al*, 2021). Consequently, there is a  
68 continuing and urgent need for effective and easy to administer antivirals against emerging  
69 SARS-CoV-2 variants. Neutralizing monoclonal antibodies (Nabs) have been granted  
70 emergency use authorization by the U.S. Food and Drug Administration and were shown to  
71 efficiently reduce mortality in COVID-19 patients with increased risk for a severe disease  
72 progression (Chen *et al*, 2020; Jiang *et al*, 2020; Weinreich *et al*, 2020). Most of these Nabs  
73 target the interaction site between receptor-binding domain (RBD) of the SARS-CoV-2 spike  
74 protein and angiotensin-converting enzyme (ACE) 2 to prevent viral entry into epithelial cells  
75 of the respiratory tract (Brouwer *et al*, 2020; Cao *et al*, 2020; Ju *et al*, 2020). However, viral  
76 escape from neutralizing antibodies resulted in several mutations affecting the RBD:ACE2  
77 interface, which impairs binding of established Nabs and thus limits current direct-acting  
78 antiviral treatment options (Diamond *et al*, 2021; Wang *et al*, 2021).

79 In parallel to conventional antibodies, camelid single-domain antibody fragments, better known  
80 as nanobodies (Nbs), have been developed to target the RBD of SARS-CoV-2 (Chi *et al*, 2020;  
81 Hanke *et al*, 2020; Huo *et al*, 2020; Wagner *et al*, 2021; Wrapp *et al*, 2020). Due to the unique

82 physicochemical properties of Nbs such as their small size, stable folding, and efficient tissue  
83 penetration, these molecules are considered to be ideal for therapeutic application. Indeed,  
84 some of these Nbs showed strong neutralizing efficacy against SARS-CoV-2, especially when  
85 used in the multivalent or multiparatopic format (Koenig *et al*, 2021; Nambulli *et al*, 2021;  
86 Schepens *et al*, 2021; Wagner *et al.*, 2021; Xiang *et al*, 2020).

87 Recently, we reported the identification of several Nbs demonstrating a high neutralizing  
88 capacity against SARS-CoV-2 and generated a biparatopic (bip) Nb (NM1267) that binds two  
89 distinct sites, one epitope inside and one outside of the RBD:ACE2 interface (Wagner *et al.*,  
90 2021). By the application of NM1267 advanced diagnostic assays were developed,  
91 determining the emergence of a neutralizing immune response in convalescent or vaccinated  
92 individuals (Becker *et al.*, 2021; Wagner *et al.*, 2021). In this study, we generated in addition  
93 to NM1267 two novel bipNbs based on Nb pairs targeting different epitopes within the RBD.  
94 Upon analyzing their affinities and stabilities in accelerated aging assays, we identified  
95 NM1267 as the most promising candidate. Based on these results, we tested the neutralizing  
96 potency of NM1267 for a B.1.351 (Beta) patient isolate in direct comparison to SARS-CoV-2  
97 WT in an *in vitro* virus neutralization test (VNT) and determined its protective efficacy *in vivo*,  
98 using transgenic mice expressing human ACE2 (K18-hACE2 mice) (McCray Jr *et al*, 2007;  
99 Winkler *et al*, 2020). Consistent with its neutralizing activity *in vitro*, NM1267 efficiently  
100 protected mice from lethal challenge with SARS-CoV-2 VOCs and profound lung tissue  
101 damage, confirming its suitability as promising drug candidate.

102

103 **Results**

104 Following our recently reported approach in which we combined two Nbs targeting different  
105 epitopes within the RBD of SARS-CoV-2 to generate the strongly neutralizing biparatopic Nb  
106 (bipNb) NM1267 (Wagner *et al.*, 2021), we designed two additional bipNbs. We genetically  
107 coupled Nbs NM1230 and NM1228, which both bind within the RBD:ACE2 interface, and  
108 NM1228 and NM1226, of which the latter targets an epitope outside the RBD:ACE2 interface,  
109 via a flexible Gly-Ser ((G<sub>4</sub>S)<sub>4</sub>) linker, resulting in the bipNbs NM1266 and NM1268, respectively  
110 (**Supplementary Table 1**). Similar to NM1267 (Wagner *et al.*, 2021), both novel bipNbs were  
111 produced with a high yield and good purity in mammalian cells and showed picomolar affinities  
112 to wild-type (WT) RBD as measured by biolayer interferometry (BLI) (**Figure 1A**). To test their  
113 potency to block the interaction between RBD, S1, or spike of SARS-CoV-2 to human ACE2,  
114 we performed a recently established multiplex ACE2 competition assay (Wagner *et al.*, 2021).  
115 The results showed that both bipNbs inhibited binding of ACE2 to all tested antigens in the low  
116 picomolar range (**Supplementary Figure 1A, C**). Additionally, we confirmed their neutralizing  
117 effect in a VNT using SARS-CoV-2 WT which revealed half maximal inhibitory concentrations  
118 (IC<sub>50</sub>s) in the nano- or picomolar range (**Supplementary Figure 1B**). Notably, NM1267 proved  
119 to be the most potent bipNb in this assay with an IC<sub>50</sub> of 380 pM (**Supplementary Figure 1C**).  
120 For further selection, we next assessed the biophysical properties of all three bipNbs by  
121 measuring thermal unfolding and aggregation with nano differential scanning fluorimetry  
122 (nanoDSF) (**Figure 1B**). While the bipNbs NM1267 and NM1268, both containing the Nb  
123 NM1226, showed a slight increase in light scattering, indicating a higher aggregation tendency  
124 at higher, non-physiological temperatures, NM1266 showed no onset of aggregation up to  
125 90°C. Reanalysis after accelerated aging at 37°C for ten days revealed no considerable  
126 differences compared to baseline (**Figure 1B**). From these data, we concluded that all three  
127 bipNbs are highly stable. However, as NM1267 showed the highest melting temperature of  
128 ~57°C (**Figure 1B**), indicating improved thermal stability, we decided to proceed with the bipNb  
129 NM1267 as our favorite candidate for the intended *in vivo* application.

130 Previously, we had shown that the individual Nbs linked to form NM1267 (NM1230 and  
131 NM1226) both exhibit strong neutralization potency regardless of whether they bind within the  
132 RBD:ACE2 interface, as shown for NM1230, or bind a more conserved region outside this  
133 interaction site, as shown for NM1226 (Wagner *et al.*, 2021) (**Supplementary Figure 2**). With  
134 the precise epitopes known, we considered that NM1267 could also be effective against lately  
135 described VOCs, since only mild binding interference were expected due to the acquired  
136 mutations (**Supplementary Figure 2**). Therefore, we analyzed binding affinities of NM1267  
137 towards RBDs of emerging SARS-CoV-2 variants using BLI (**Figure 2A-I**). Compared to  
138 RBD<sub>wt</sub>, NM1267 showed similar or even better binding to RBDs from B.1.1.7 (Alpha) (**Figure**  
139 **2A**), B.1.351 (Beta) (**Figure 2B**), P1 (Gamma) (**Figure 2C**), P3 (Theta) (**Figure 2F**) and A.23.1  
140 (**Figure 2H**), while a slight decrease in affinity was observed for RBDs from B.1.617.2 (Delta)  
141 (**Figure 2D**), B.1.429 (Epsilon) (**Figure 2E**) and B.1.617.1 (Kappa) (**Figure 2G**). However, the  
142 measured affinities in the picomolar range confirmed the high potential of NM1267 to also bind  
143 SARS-CoV2 variants with mutations at the RBD:ACE2 interface (**Figure 2A-I, Supplementary**  
144 **Figure 2**).

145 Preceding studies have shown that the B.1.351 (Beta) variant is able to evade immune  
146 response after vaccination or treatment with already established Nabs (Madhi *et al.*, 2021;  
147 Wang *et al.*, 2021), probably due to the three distinct escape mutations within the RBD (K417N,  
148 E484K, N501Y) (Li *et al.*, 2021; Zhou *et al.*, 2021). Therefore, determination of the neutralization  
149 capacity of NM1267 against a clinical isolate of B.1.351 (Beta) SARS-CoV-2 (Becker *et al.*,  
150 2021) was of particular interest. Performing VNTs, human Caco-2 cells were co-incubated with  
151 serial dilutions of NM1267 and WT or B.1.351 (Beta) SARS-CoV-2. As negative control a non-  
152 specific bivalent Nb (bivNb) NM1251 was applied in the same setting. Immunofluorescence  
153 (IF) staining of the virus was performed 48 h after infection, and infection rates were  
154 determined by automated fluorescence microscopy. NM1267 showed strong neutralization of  
155 both variants, SARS-CoV-2 WT and SARS-CoV-2 B.1.351 (Beta), with IC<sub>50</sub> values of 0.33 nM  
156 and 0.78 nM, respectively, whereas no effect was observed for the treatment with NM1251  
157 (**Figure 3A-C**).

158 To examine the *in vivo* potency of NM1267, we utilized transgenic K18-hACE2 mice expressing  
159 human ACE2, which are highly permissive for infection with human SARS-CoV-2 isolates  
160 (Winkler *et al.*, 2020). Considering the broad applicability for which noninvasive routes of  
161 administration are preferred, we chose intranasal administration of NM1267. Mice were treated  
162 in a prophylactic treatment setting with either 20 µg of NM1267 or the non-specific control  
163 (NM1251), followed by SARS-CoV-2 WT or B.1.351 (Beta) infection 7 h later (**Figure 4A**).  
164 Weight loss and survival of infected mice were monitored for 14 days post-infection (d p.i.). All  
165 WT virus infected animals treated with the negative control NM1251 became severely sick with  
166 obvious clinical signs of pneumonia, lost substantial amounts of body weight, and 14 out of 15  
167 animals had to be euthanized (**Figure 4B, C**). In contrast, administration of the SARS-CoV-2  
168 neutralizing NM1267 significantly reduced signs of disease, weight loss and 9 out of 12 animals  
169 survived the infection. Additionally, virus shedding by NM1267-treated mice, determined by  
170 viral load on nasal swabs, was significantly reduced in comparison with control animals  
171 (**Figure D**). Infection of non-specific NM1251-treated mice with the VOC B.1.351 (Beta) also  
172 induced substantial weight loss, severe disease symptoms, and 7 out of 9 animals had to be  
173 euthanized (**Figure 4E, F**). Similarly to what was observed for the WT virus infection, only one  
174 NM1267-treated mouse infected with B.1.351 (Beta) lost substantial amounts of weight and  
175 had to be euthanized, whereas 5 out of 6 animals did not show any signs of disease and  
176 survived the infection.

177 Next, we performed histopathological analyses of infected lung tissue samples from treated  
178 mice to evaluate the degree of tissue damage upon infection by hematoxylin and eosin (H&E)  
179 staining, and the extent and localization of viral RNA-positive lung tissue by *in situ* hybridization  
180 (ISH). Applying a grading system from 0 (no tissue damage) to 4 (strong tissue damage), it  
181 became evident that all SARS-CoV-2 infected mice under control treatment (NM1251)  
182 exhibited a pronounced inflammation and loss of functional lung epithelia (**Figure 5A-C**). In  
183 particular, infection with the B.1.351 (Beta) variant caused massive tissue damage in NM1251-  
184 treated mice, reaching highest scores between 3 and 4. Notably, prophylactic treatment with  
185 NM1267 efficiently reduced virus- and inflammation-induced tissue damage within the lungs



186 (scoring 0.5-1.5) of both, SARS-CoV-2 WT and B.1.351 (Beta) infected mice (**Figure 5A-C**).

187 In line with these findings, distinctly lower levels of SARS-CoV-2 RNA were found in samples

188 taken from NM1267-treated mice, restricted to small areas of the lung at sub-pleural position

189 and some fat cells. In contrast, tissue sections of control-treated (NM1251) mice showed that

190 epithelial cells in large areas of the lung were virus RNA positive, independent of the SARS-

191 CoV-2 variant (**Figure 5B**). In summary, these data provide strong evidence that intranasal

192 application of bipNb NM1267 successfully prevents SARS-CoV-2-induced tissue damage,

193 disease progression, and that the prophylactic treatment reduces virus shedding and mortality

194 *in vivo*.

195

## 196 **Discussion**

197 The ongoing COVID-19 pandemic and the frequent emergence of new SARS-CoV-2 variants  
198 of concern highlight the need of easily applicable therapeutic options. In addition to Nabs, Nbs  
199 targeting the RBD of SARS-CoV-2 offer a promising alternative. Not only their stable folding,  
200 robust biochemical properties, and ease of functionalization/ multimerization, but also the lack  
201 of an Fc moiety that prevents severe adverse events such as ADE and their low  
202 immunogenicity underlines the potential of Nbs as advanced therapeutic tools (Muyldermans,  
203 2013; Taylor *et al*, 2015; Tirado & Yoon, 2003). In this context, prophylactic or therapeutic  
204 administration of neutralizing Nbs have already been shown not only to limit virus replication  
205 and weight loss in animals, but also to minimize lung damage and mortality in transgenic  
206 hACE2 mice and Syrian hamsters after infection with SARS-CoV-2 variants (Haga *et al*, 2021;  
207 Hanke *et al*, 2021; Nambulli *et al.*, 2021; Schepens *et al.*, 2021; Wrapp *et al.*, 2020).

208 Recently, we identified neutralizing Nbs and showed their applicability to quantify neutralizing  
209 antibodies in serum from convalescent and immunized individuals (Becker *et al.*, 2021;  
210 Wagner *et al.*, 2021). In this study, we investigated the therapeutic potential of multiple  
211 biparatopic Nbs that jointly target different epitopes within the RBD. All bipNbs revealed  
212 comparable picomolar affinities to RBD<sub>WT</sub>, strong ACE2 displacement and high neutralization  
213 capacities. However, since NM1267 showed the highest thermal stability and detailed data on  
214 the recognized epitopes were already available (Wagner *et al.*, 2021), we selected NM1267  
215 as most promising drug candidate. Hypothesizing that combinatorial binding to epitopes within  
216 the RBD:ACE2 interface and to conserved epitopes outside this interaction site might be  
217 beneficial to also cover emerging VOCs, we were subsequently able to show strong binding of  
218 NM1267 to all SARS-CoV-2 RBD variants tested. We further, demonstrated a high neutralizing  
219 capacity of NM1267 for SARS-CoV-2 WT and the B.1.351 (Beta) variant in VNTs. Use of  
220 NM1267 for prophylactic intranasal application strongly diminished disease progression in both  
221 SARS-CoV-2 WT and B.1.351 (Beta) infected mice and resulted in 4.6- to 11.2-fold increased  
222 survival rates compared to control-treated animals. Overall, these data underscore the  
223 potential of NM1267 to treat infections with VOCs for which currently available vaccines and

224 therapeutic approaches are suspected to have reduced efficacy (Becker *et al.*, 2021; Kustin *et*  
225 *al.*, 2021; Madhi *et al.*, 2021; Planas *et al.*, 2021; Zhou *et al.*, 2021). Histopathological analyses  
226 and *in situ* hybridization detecting viral RNA in lung tissue samples further revealed  
227 dramatically reduced tissue damage and viral load suggesting that NM1267 treatment may  
228 also reduce long-term effects of SARS-CoV-2 infections (Han *et al.*, 2021; Yong, 2021).

229 Notably, most strategies for engineering neutralizing Nbs currently rely on increasing avidity  
230 by generating multivalent constructs binding the same epitope (Nambulli *et al.*, 2021;  
231 Schepens *et al.*, 2021; Wu *et al.*, 2021). To date, solely Hanke *et al.* followed a similar strategy  
232 as suggested in this study, by coupling two different Nbs, Fu2 and Ty1, to generate a potential  
233 therapeutic molecule. However, these two Nbs recognize overlapping epitopes at the  
234 RBD:ACE2 interaction site (Hanke *et al.*, 2021), which could facilitate virus escape.

235 The administration of NM1267 showed strong short-term efficacy *in vivo*. However, certain  
236 modifications like fusion to an Fc-moiety, albumin binding motif or directly to carrier proteins  
237 like albumin may improve duration of effectiveness (Hanke *et al.*, 2021; Nambulli *et al.*, 2021;  
238 Schepens *et al.*, 2021; Wu *et al.*, 2021). Moreover, the extreme susceptibility of transgenic  
239 hACE2 mice to SARS-CoV-2-induced disease due to the artificial overexpression of hACE2 in  
240 a variety of tissues and organs, may even result in an underestimated therapeutic potential of  
241 NM1267. To address this issue and to investigate also the potential of NM1267 to prevent  
242 active transmission of SARS-CoV-2 via direct contact and aerosol, further studies in more  
243 physiological models, such as Syrian hamsters or non-human primates, would be required  
244 (Haga *et al.*, 2021; Nambulli *et al.*, 2021; Schepens *et al.*, 2021).

245 In summary, with the development and detailed characterization of the neutralizing potential  
246 of NM1267 in combination with intranasal *in vivo* application, we offer a straightforward  
247 prophylactic, and possibly therapeutic, approach to combat infections with emerging VOCs.  
248 Given the poor access to vaccines in various countries, vaccination fatigue and the frequent  
249 emergence of new variants of concern, we believe that the development of such easily  
250 applicable therapeutic approaches to protect and treat predisposed individuals are highly  
251 promising strategies and urgently warranted.

## 252 **Material & Methods**

### 253 **Expression constructs**

254 To generate described expression constructs all used primer sequences are listed in  
255 **Supplementary Table 2**. Nb NM1267 was generated as described previously (Wagner *et al.*,  
256 2021). To generate bipNb NM1266, Nb NM1230 was genetically fused via internal (G<sub>4</sub>S)<sub>4</sub>-  
257 linker to the N-terminus of Nb NM1228 (Wagner *et al.*, 2021). Nb cDNAs were PCR amplified  
258 by the use of primers NM1230Nfor, NM1230Nrev and NM1228Cfor, NM1228Nrev and  
259 subsequently fused by overlap extension PCR. BipNb NM1268 composed of Nb NM1228 and  
260 Nb NM1226 (Wagner *et al.*, 2021) was similarly generated using primers NM1228Nfor,  
261 NM128Nrev and NM1226Cfor, NM1226Crev. DNA coding for bipNbs were cloned into  
262 pCDNA3.4 expression vector seamlessly downstream of comprising N-terminal signal peptide  
263 (MGWTLVFLFLLSVTAGVHS) for secretory pathway using type IIS restriction enzyme Esp3I  
264 and EcoRI site. Coding sequence of bivNb NM1251 (Traenkle *et al.*, 2020) was produced by  
265 gene synthesis (Thermo Fisher Scientific, Massachusetts, USA) and similarly cloned into  
266 pCDNA3.4 expression vector.

267 Receptor binding domain (RBD) variants of SARS-CoV-2 were generated as earlier published  
268 (Wagner *et al.*, 2021). The expression plasmid pCAGGS encoding the receptor-binding  
269 domain (RBD) of SARS-CoV-2 spike protein (amino acids 319-541) was kindly provided by F.  
270 Krammer. RBDs of SARS-CoV-2 variants of concern (VOCs) B.1.1.7 (Alpha), B.1.351 (Beta),  
271 P1 (Gamma), A.1.617.2 (Delta), B.1.429 (Epsilon), P3 (Theta), B.1.617.1 (Kappa) and A.23.1  
272 were generated by PCR amplification of fragments from WT or cognate DNA template and  
273 subsequent fusion PCR by overlap extension to introduce described mutations. Based on  
274 RBD<sub>WT</sub> sequence primer pairs RBDfor N501Yrev and N501Yfor RBDrev were used for the  
275 amplification of B.1.1.7 (Alpha) sequence; primer pairs RBDfor L452Rrev and L452Rfor  
276 RBDrev for B.1.429 (Epsilon); RBDfor, V367Frev and V367Ffor, RBDrev for A.23.1. A.1.617.2  
277 (Delta) was generated based on B.1.429 (Epsilon) using primer pairs RBDfor T478Krev and  
278 T478Kfor RBDrev. Based on B.1.1.7 (Alpha) sequence P3 (Theta) was generated using primer  
279 pairs RBDfor E484Krev and E484Kfor RBDrev. B.1.617.1 (Kappa) was generated using primer

280 pairs RBDfor E484Krev and E484Kfor RBDrev as well as RBDfor L452Rrev and L452Rfor  
281 RBDrev. B.1.351 (Beta) and P1 (Gamma) were generated based on P3 (Theta) sequence  
282 using primer pairs RBDfor K417Nrev and K417Nfor RBDrev; and RBDfor K417Trev and  
283 K417Tfor RBDrev, respectively.

284 Amplicons were inserted using Xbal and NotI site into the pCDNA3.4 expression vector. The  
285 integrity of all expression constructs was confirmed by standard sequencing analysis.

286

### 287 **Protein expression and purification**

288 Confirmed constructs were expressed in Expi293 cells. Briefly, cells were cultivated (37°C,  
289 125 rpm, 8% (v/v) CO<sub>2</sub>) to a density of  $5.5 \times 10^6$  cells/ mL, diluted with Expi293F expression  
290 medium and transfection of the corresponding plasmids (1 µg/mL) with expifectamine. 20 h  
291 post transfection enhancers were added as per the manufacturer's instructions. Cell  
292 suspensions were then cultivated for 2–5 days (37 °C, 125 rpm, 8% (v/v) CO<sub>2</sub>) and then  
293 centrifuged (4°C, 23,900×g, 20 min) to clarify the supernatant. Supernatants were then filtered  
294 with a 0.22-µm membrane (Millipore, Darmstadt, Germany) and supplemented with His-A  
295 buffer stock solution (20 mM Na<sub>2</sub>HPO<sub>4</sub>, 30 mM NaCl, 20 mM imidazole, pH 7.4). The solution  
296 was then applied to a HisTrap FF crude column on an Aekta pure system (GE Healthcare,  
297 Freiburg, Germany), extensively washed with His-A buffer, and eluted with an imidazole  
298 gradient (50–400 mM). Buffer exchange to PBS and concentration of eluted proteins were  
299 carried out using Amicon 10 K centrifugal filter units (Millipore, Darmstadt, Germany). Protein  
300 quality was analyzed by standard SDS-Page and via the NanoDrop protein concentration was  
301 determined.

302

### 303 **Affinity measurements**

304 Binding affinity of bipNbs towards variants of RBD was determined via biolayer interferometry  
305 (BLI) using the Octet RED96e system according to standard protocol. Therefore, RBD variants  
306 were biotinylated and immobilized on streptavidin biosensors (SA, Sartorius). Dilution series

307 ranging from 5-0.625 nM of bipNbs were applied and one reference was included per run. For  
308 affinity determination, the 1:1 global fit of the Data Analysis HT 12.0 software was used.

309

### 310 **Bead-based multiplex ACE2 competition assay**

311 To analyze binding competition of human ACE2 versus generated bipNbs the bead-based  
312 multiplex ACE2 competition assay was performed as previously described (Wagner *et al.*,  
313 2021).

314

### 315 **Stability analysis**

316 Stability analysis was performed by the Prometheus NT.48 (Nanotemper). Therefore, freshly-  
317 thawed bipNbs were diluted to 0.25 mg/mL and measurements were carried out at time point  
318  $T_0$  and after incubation for ten days at 37°C ( $T_{10}$ ) using high-sensitivity capillaries. Thermal  
319 unfolding and aggregation of the bipNbs is induced by the application of a thermal ramp of  
320 20-95°C, while measuring fluorescence ratios (F350/F330) and light scattering. Via the  
321 PR. ThermControl v2.0.4 the melting ( $T_m$ ) and aggregation ( $T_{Agg}/ T_{turbidity}$ ) temperature was  
322 determined.

323

### 324 **Viruses**

325 All experiments associated with the SARS-CoV-2 virus were conducted in Biosafety Level 3  
326 laboratory. The recombinant infectious SARS-CoV-2 clone expressing mNeonGreen (icSARS-  
327 CoV-2-mNG) (PMID: 32289263) was obtained from the World Reference Center for Emerging  
328 Viruses and Arboviruses (WRCEVA) at the UTMB (University of Texas Medical Branch) (Xie  
329 *et al.*, 2020) and used as described (Ruetalo *et al.*, 2021). SARS-CoV-2 WT (SARS-CoV-2 Tü1  
330 or SARS-CoV-2 Muc IMB-1) and SARS-CoV-2 B.1.351 (Beta) (SARS-CoV SA<sub>v</sub>) were isolated  
331 from patient samples and variant identity was confirmed by next-generation sequencing of the  
332 entire viral genome as described in (Ruetalo *et al.*, 2021) and (Becker *et al.*, 2021),  
333 respectively.

334

### 335 **Virus neutralization assay (VNT)**

336 Caco-2 (Human Colorectal adenocarcinoma, ATCC HTB-37) cells were cultured at 37°C with  
337 5% CO<sub>2</sub> in DMEM containing 10% FCS, 2 mM l-glutamine, 100 µg/ml penicillin-streptomycin  
338 and 1% NEAA.

339 Neutralization assays using clinical isolates (**Figure 3A-C**) were performed as described in  
340 (Becker *et al.*, 2021; Ruetalo *et al.*, 2021). Briefly, cells were co-incubated with the respective  
341 clinical isolate SARS-CoV-2 WT (200325\_Tü1) at an MOI of 0.8 or SARS-CoV-2 B.1.351  
342 (Beta) (210211\_SAv) at an MOI of 0.6 and serial dilutions of the bipNb from 5 µM to 0.064 nM.  
343 48 h post-infection, cells were fixed with 80% acetone, and immune fluorescence (IF) staining  
344 was performed using an anti-SARS-CoV-2 nucleocapsid antibody (rabbit) and a goat anti-  
345 rabbit Alexa594 conjugated secondary antibody. Cells were counterstained with DAPI solution  
346 and images were taken with the Cytation3 (BioTek). Infection rates were calculated as the ratio  
347 of DAPI-positive over Alexa594-positive cells, which were automatically counted by the Gen5  
348 software (BioTek). In the case of the neutralization assay using the icSARS-CoV-2-mNG  
349 (**Supplementary Figure 1A-C**) the protocol was previously described in (Ruetalo *et al.*, 2021;  
350 Wagner *et al.*, 2021). Data were normalized to respective virus-only infection control. Inhibitory  
351 concentration 50 (IC<sub>50</sub>) was calculated as the half-maximal inhibitory dose using 4-parameter  
352 nonlinear regression (GraphPad Prism).

353

### 354 ***In vivo* infection experiments**

355 Transgenic (K18-hACE2)<sup>2Prlmn</sup> mice were purchased from The Jackson Laboratory and bred  
356 and kept under specific-pathogen-free conditions in the animal facilities of the University  
357 Medical Center Freiburg. Hemizygous 8-14 week-old animals of both sexes were used in  
358 accordance with the guidelines of the Federation for Laboratory Animal Science Associations  
359 and the National Animal Welfare Body. All experiments were in compliance with the German  
360 animal protection law and approved by the animal welfare committee of the  
361 Regierungspraesidium Freiburg (permit G-20/91). Mice were anesthetized using isoflurane  
362 and treated intranasally (i.n.) with 20 µg of NM1251 or NM1267 seven hours prior to infection

363 with  $3 \times 10^3$  PFU of the respective SARS-CoV-2 isolate (SARS-CoV-2 WT (SARS-CoV-2 Muc-  
364 IMB-1) and SARS-CoV B.1.351 (Beta) (SARS-CoV-2 SA $\nu$ )) in 40  $\mu$ l PBS containing 0.1% BSA.  
365 Infected mice were monitored for weight loss and clinical signs of disease for 14 days and  
366 sacrificed if severe symptoms were observed or body weight loss exceeded 25% of the initial  
367 weight. Superficial nasal swabs were taken on days 1, 2 and 3 post infection. Swabs were  
368 collected in OptiMEM containing 0.3% BSA and titers determined by plaque assay using Vero  
369 E6 cells. Infected ketamine/ xylazine-anesthetized mice were prepared for histological  
370 analyses by transcardial perfusion with 15 ml of 4% formaldehyde solution and stored in 4 %  
371 formaldehyde at 4 °C until organs were processed further. All experiments were performed  
372 under BSL3 conditions.

373

#### 374 **Haematoxylin and eosin (H&E) staining and *in situ* hybridization (ISH)**

375 Lung tissue was routinely embedded in paraffin and H&E staining was performed from 4  $\mu$ m  
376 thick lung tissue sections by using the Tissue-Tek® Prisma (Sakura, Umkirch, Germany). To  
377 detect SARS-CoV-2 RNA (plus-strand RNA), 4  $\mu$ m thick lung tissue sections, including  
378 negative and positive controls, were hybridized using specific probes for SARS-CoV-2  
379 (Advanced Cell Diagnostics (ACD), Newark, CA, USA) followed by the RNAscope 2.5 HD  
380 Detection Kit Red from ACD (Newark, CA, USA) according to the manufacturer's protocol.  
381 Quantification of tissue damage including inflammation was defined as grade 0: no damage,  
382 grade 1: 1-10%, grade 2: 10-20%, grade 3: 20-50%, grade 4: 50-80% of lung tissue was  
383 involved.

384

385 **Analyses and Statistics** Graph preparation and statistical analysis was performed using the  
386 GraphPad Prism Software (Version 9.0.0 or higher).

387

388



389 **Data availability**

390 The data that support the findings of this study are available from the corresponding authors  
391 upon reasonable request.

392

393 **Acknowledgements**

394 This work was supported by the Initiative and Networking Fund of the Helmholtz Association  
395 of German Research Centers (grant number SO-96), the European Union's Horizon 2020  
396 research and innovation program under grant agreement No 101003480—CORESMA. This  
397 work has further received funding from the State Ministry of Baden-Württemberg for Economic  
398 Affairs, Labour and Housing Construction (FKZ 3-4332.62-NMI/68), from the Ministry of  
399 Science, Research and Arts of the State of Baden-Württemberg (COVID-19 funding) and from  
400 the Deutsche Herzstiftung. This work was supported by the Bundesministerium fuer Bildung  
401 und Forschung (BMBF) through the Deutsches Zentrum fuer Luft- und Raumfahrt, Germany,  
402 (DLR, grant number 01KI2077) and by the Federal State of Baden-Wuerttemberg, Germany,  
403 MWK-Sonderfoerdermaßnahme COVID-19/AZ.:33-7533.-6-21/7/2 to MS. We thank Florian  
404 Krammer for providing expression constructs for SARS-CoV-2 homotrimeric Spike and RBD.

405

406 **Authorship Contributions**

407 Study design: TRW, DS, MiS, MS, UR; Nb biochemical characterization: TRW, PDK, BT, DIF;  
408 Multiplex binding assay: DJ, MB, NSM; Virus neutralization assays: NR, MiS; mouse infection  
409 experiments: DS, JB, AO; histopathological analysis and *in situ* hybridization: KK, MSa; Data  
410 analysis and statistical analysis: TRW, DS, JB, NR, MiS, KK, MS, UR; Manuscript drafting:  
411 TRW, UR; Study supervision: MS, UR; Manuscript reviewing and editing: All authors.

412

413 **Conflict of Interest**

414 TRW, PDK, NSM, and UR are named as inventors on a patent application (EP 20 197 031.6)  
415 claiming the use of the described Nanobodies for diagnosis and therapeutics filed by the  
416 Natural and Medical Sciences Institute. The other authors declare no competing interest.

417 **Figure Legends**

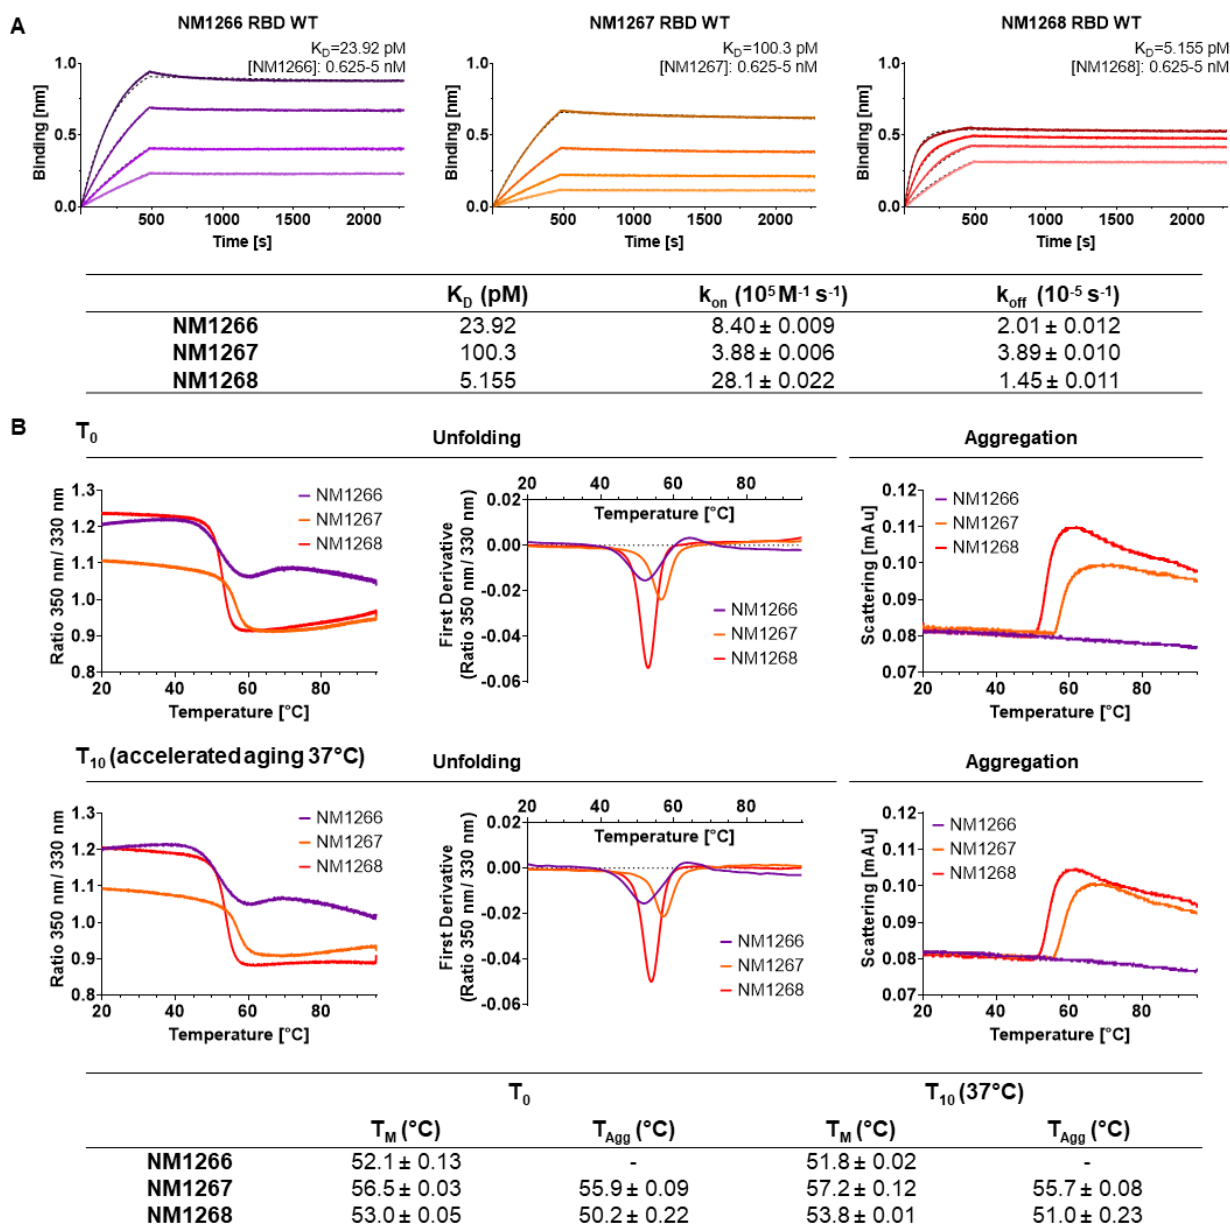

418

419 **Figure 1. Affinity and stability of different biparotopic Nanobodies.**

420 **A** Affinity measurements by biolayer interferometry (BLI) of bipNbs NM1266, NM1267 and  
 421 NM1268. bipNbs were applied with concentrations ranging from 5–0.625 nM (illustrated with  
 422 gradually lighter shades) on immobilized wild-type RBD (RBD WT). Global 1:1 fits are  
 423 illustrated as dashed lines and binding affinity ( $K_D$ ), association ( $k_{on}$ ) and dissociation constant  
 424 ( $k_{off}$ ) determined for the individual bipNbs are summarized.

425 **B** Stability analysis of bipNbs NM1266, NM1267 and NM1268 was performed at time points  $T_0$   
 426 and  $T_{10}$  after storage at 37°C for ten days to induce accelerated aging. Protein unfolding was

427 determined by fluorescence emission wavelengths shifts illustrated as fluorescence ratios  
428 (350 nm/ 330 nm) and its first derivative. Protein aggregation status was measured by light  
429 intensity loss due to scattering. Melting ( $T_m$ ) and aggregation ( $T_{Agg}$ ) temperature are  
430 summarized as table for both time points.

431

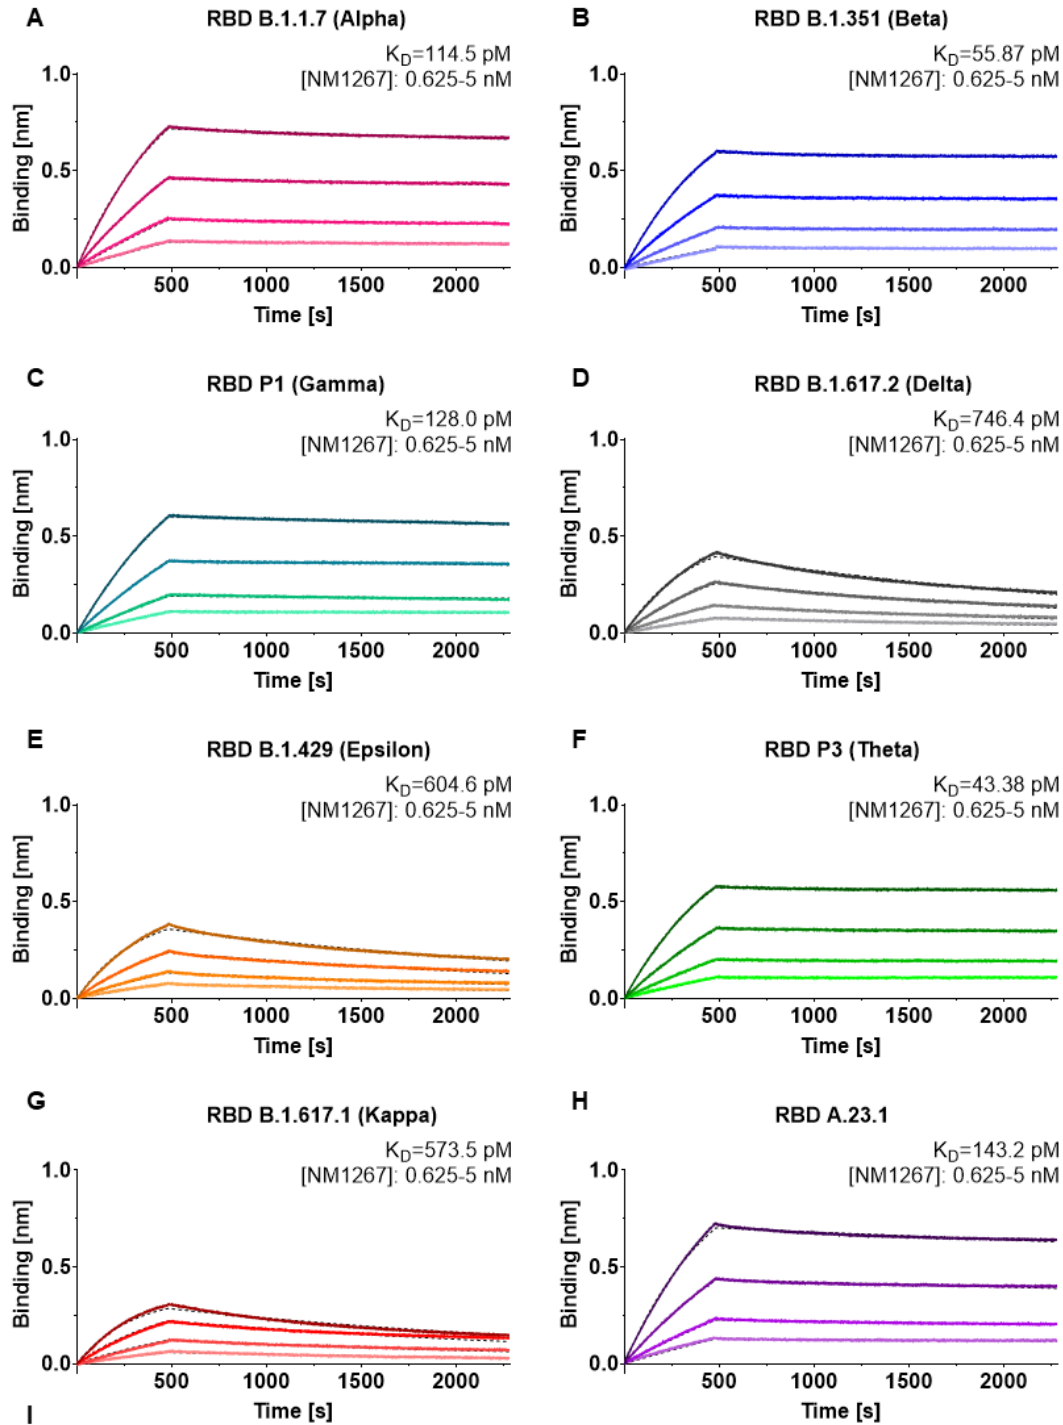

| Pangolin (WHO)    | $K_D$ (pM) | $k_{\text{on}}$ ( $10^5 \text{ M}^{-1} \text{ s}^{-1}$ ) | $k_{\text{off}}$ ( $10^{-5} \text{ s}^{-1}$ ) |
|-------------------|------------|----------------------------------------------------------|-----------------------------------------------|
| B.1.1.7 (Alpha)   | 114.5      | $3.87 \pm 0.007$                                         | $4.43 \pm 0.011$                              |
| B.1.351 (Beta)    | 55.87      | $3.96 \pm 0.007$                                         | $2.21 \pm 0.011$                              |
| P1 (Gamma)        | 128.0      | $2.75 \pm 0.007$                                         | $3.53 \pm 0.011$                              |
| B.1.617.2 (Delta) | 764.4      | $5.17 \pm 0.016$                                         | $38.6 \pm 0.031$                              |
| B.1.429 (Epsilon) | 604.6      | $5.68 \pm 0.018$                                         | $34.4 \pm 0.032$                              |
| P3 (Theta)        | 43.38      | $3.96 \pm 0.006$                                         | $1.27 \pm 0.010$                              |
| B.1.617.1 (Kappa) | 573.5      | $6.46 \pm 0.028$                                         | $37.0 \pm 0.048$                              |
| A.23.1            | 143.2      | $4.20 \pm 0.008$                                         | $6.01 \pm 0.013$                              |

433 **Figure 2. Biparatopic NM1267 targets several recently identified RBD variants with**  
434 **picomolar affinity.**

435 **A-H** Affinity measurements by BLI of bipNb NM1267 on recently identified RBD variants  
436 B.1.1.7 (Alpha) (**A**), B.1.351 (Beta) (**B**), P1 (Gamma) (**C**), A.1.617.2 (Delta) (**D**), B.1.429  
437 (Epsilon) (**E**), P3 (Theta) (**F**), B.1.617.1 (Kappa) (**G**) and A.23.1 (**H**). NM1267 was applied with  
438 concentrations ranging from 5–0.625 nM (illustrated with gradually lighter shades) on  
439 immobilized RBD variants. Global 1:1 fits are illustrated as dashed lines.

440 **I** Tabular summary of binding affinity ( $K_D$ ), association ( $k_{on}$ ) and dissociation constant ( $k_{off}$ )  
441 determined for the individual RBD variants.

442

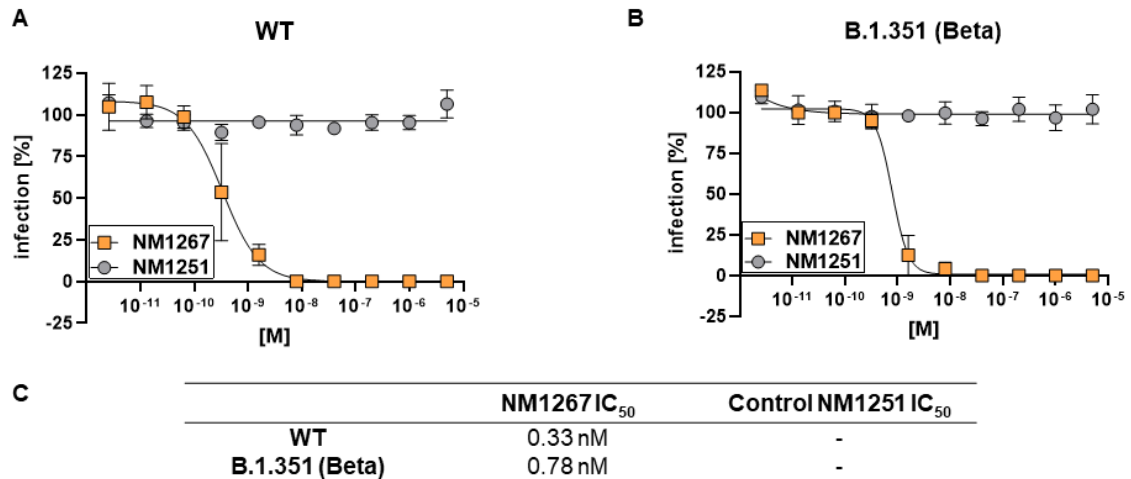

443

444 **Figure 3. Bipartopic NM1267 neutralizes wild-type and B.1.351 SARS-CoV-2 infection**  
445 **in Caco-2 cells.**

446 **A, B** Neutralization potency of NM1267 was analyzed in Caco-2 cells using the SARS-CoV-2  
447 WT (**A**) and SARS-CoV-2 B.1.351 (Beta) (**B**). Infection normalized to virus-only infection  
448 control is illustrated as percent of infection (infection [%]). Data are presented as mean ± SEM  
449 of three biological replicates (n = 3).

450 **C** Tabular summary of IC<sub>50</sub> values, calculated from a four-parametric sigmoidal model.

451

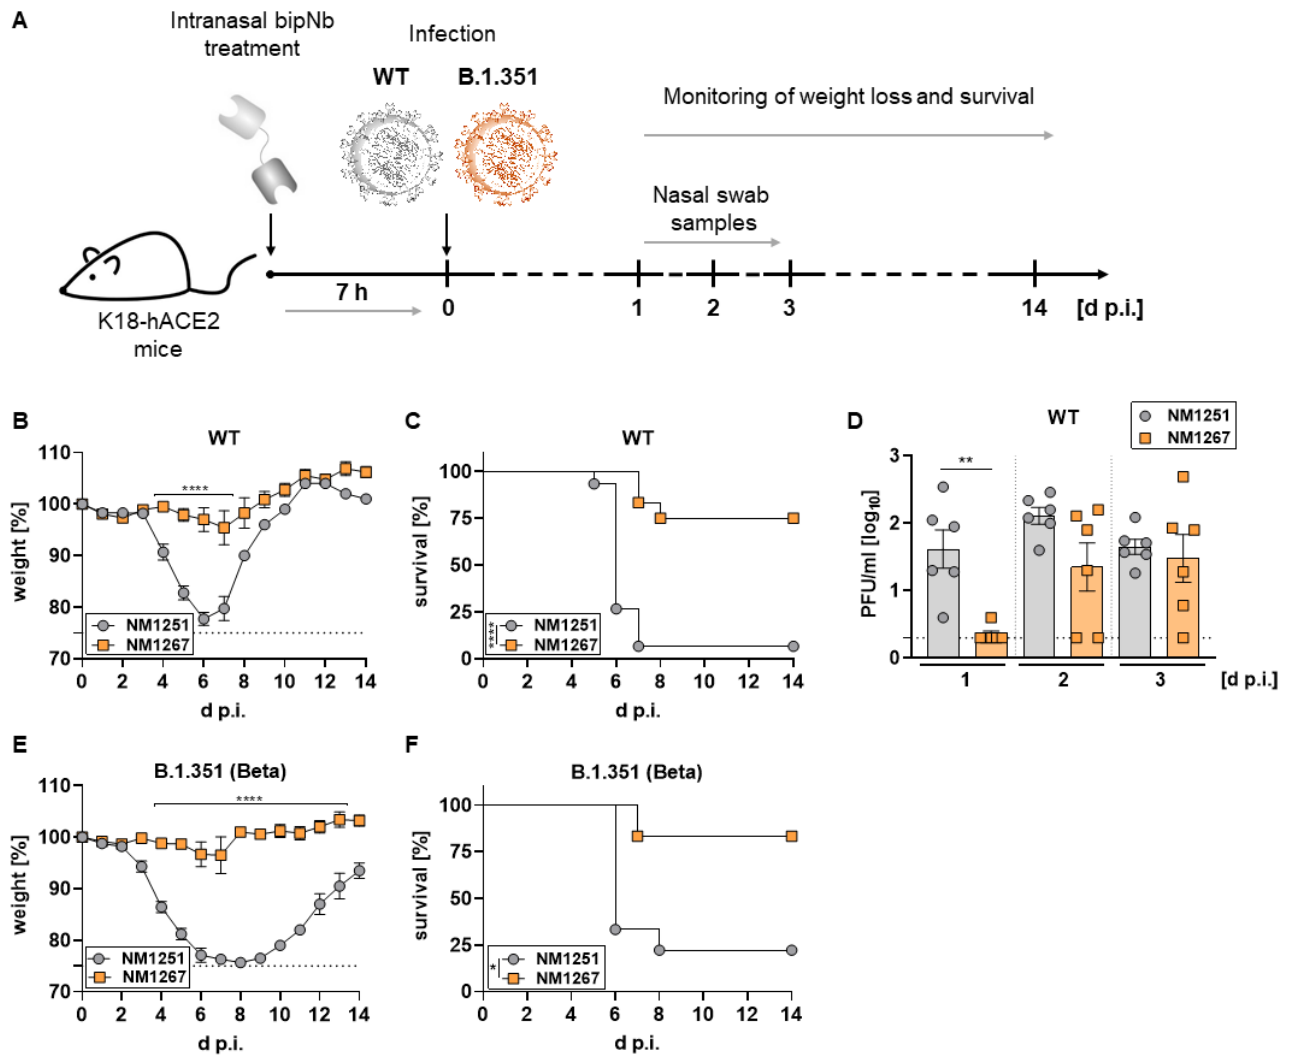

452

453 **Figure 4. Intranasal application of NM1267 protects K18-hACE2 mice against**  
 454 **SARS-CoV-2 induced disease and reduces mortality and virus shedding.**

455 **A** Schematic illustration of treatment scheme.

456 **B-D** Hemizygous K18-hACE2 mice were treated intranasally with 20 µg of NM1251 (n = 15) or  
 457 NM1267 (n = 12) seven hours prior to infection with  $3 \times 10^3$  PFU SARS-CoV-2 WT. Weight loss

458 **(B)** and survival **(C)** were monitored for 14 days. Nasal swabs were collected from six mice  
 459 per group at the indicated time points and viral load determined by plaque-assay **(D)**. Symbols

460 represent mean  $\pm$  SEM in **(B)** or individual animals in **(D)**. Bars in **(D)** represent mean  $\pm$  SEM

461 \*\*\*\* $P < 0.0001$ , by two-way ANOVA with Sidak's multiple comparisons test in **(B)**,

462 \*\*\*\* $P < 0.0001$ , by log-rank test in **(C)** and \*\* $P < 0.01$ , by unpaired t test in **(D)**.

463 **E-F** Hemizygous K18-hACE2 mice were treated intranasally with 20 µg of NM1251 (n = 9) or  
464 NM1267 (n = 6) seven hours prior to infection with  $3 \times 10^3$  PFU SARS-CoV-2 B.1.351 (Beta).  
465 Weight loss (**E**) and survival (**F**) were monitored for 14 days. Symbols in (E) represent  
466 mean  $\pm$  SEM. \*\*\*\* $P < 0.0001$ , by 2way ANOVA with Sidak's multiple comparisons test in (E)  
467 and \* $P < 0.05$ , by log-rank test in (F).  
468



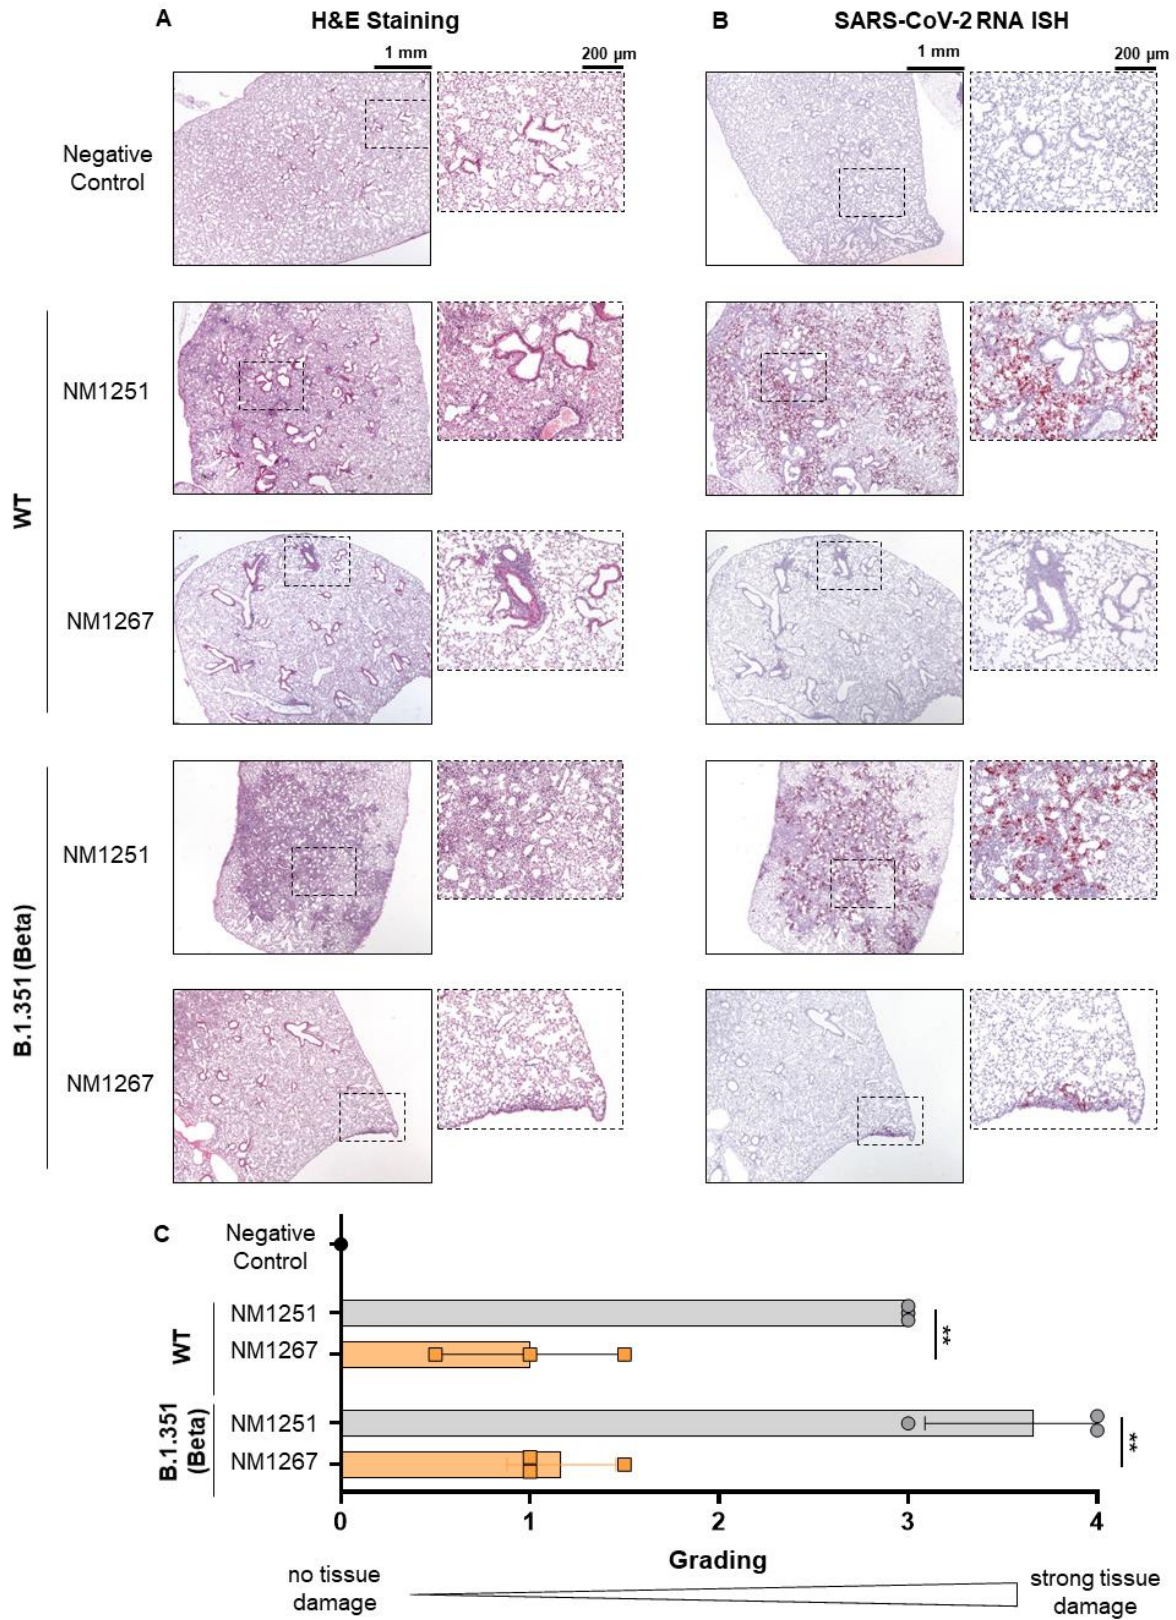

469

470

471

472 **Figure 5. Microscopic analysis of lung tissue from SARS-CoV-2 infected K18-hACE2**  
473 **mice.**

474 Mice were intranasally treated with bipNB NM1267 or control Nb NM1251 and subsequently  
475 infected with  $3 \times 10^3$  PFU SARS-CoV-2 WT or B.1.351 (Beta) variant.

476 **A-B** Serial tissue sections revealed severe inflammation (H&E) and numerous widespread  
477 SARS-CoV-2 RNA positive alveolar epithelia cells and macrophages (*in situ* hybridization  
478 (ISH)) in lungs of infected, control-treated mice. In infected and NM1267 bipNb treated animals  
479 no inflammation or only small focal areas with inflammation and a few SARS-CoV-2 RNA  
480 positive cells were observed.

481 **C** Quantification of lung damage was done in  $n = 3$  animals per group and grading score of  
482 individual animals is presented as mean  $\pm$  SD with  $**P < 0.01$ , by unpaired t test.

483

484

485

486 **Supplementary Information**

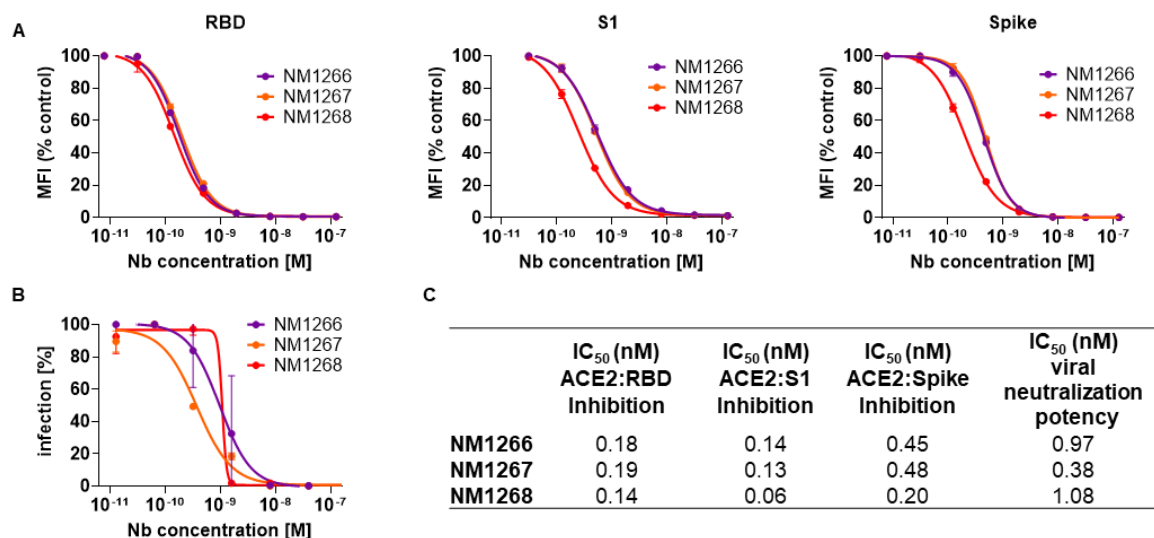

487

488 **Supplementary Figure 1. Biparatomic NM1266, NM1267 and NM1268 compete with ACE2**  
 489 **and neutralizes SARS-CoV-2 infection.**

490 **A** Results from multiplex ACE2 competition assay are shown for the three spike-derived  
 491 antigens: RBD, S1-domain (S1), and homotrimeric spike (Spike). Color-coded beads coated  
 492 with the respective antigens were co-incubated with biotinylated ACE2 and dilution series of  
 493 NM1266, NM1267 and NM1268 (8 pM to 126 nM) followed by measuring residual binding of  
 494 ACE2. MFI signals were normalized to the maximum detectable signal per antigen given by  
 495 the ACE2-only control. IC<sub>50</sub> values were calculated from a four-parametric sigmoidal model.  
 496 Data are presented as mean ± SD of three technical replicates.

497 **B** Neutralization potency of NM1266, NM1267 and NM1268 was analyzed in Caco-2 cells  
 498 using the SARS-CoV-2-mNG infectious clone. Infection rate normalized to virus-only infection  
 499 control is illustrated as percent of infection (infection [%]). IC<sub>50</sub> value was calculated from a  
 500 four-parametric sigmoidal model, and data are presented as mean ± SEM of three biological  
 501 replicates (n = 3).

502 **C** Table summarizing IC<sub>50</sub> values of the multiplex ACE2 competition assay and virus  
 503 neutralization assay obtained for NM1266, NM1267 and NM1268.

504

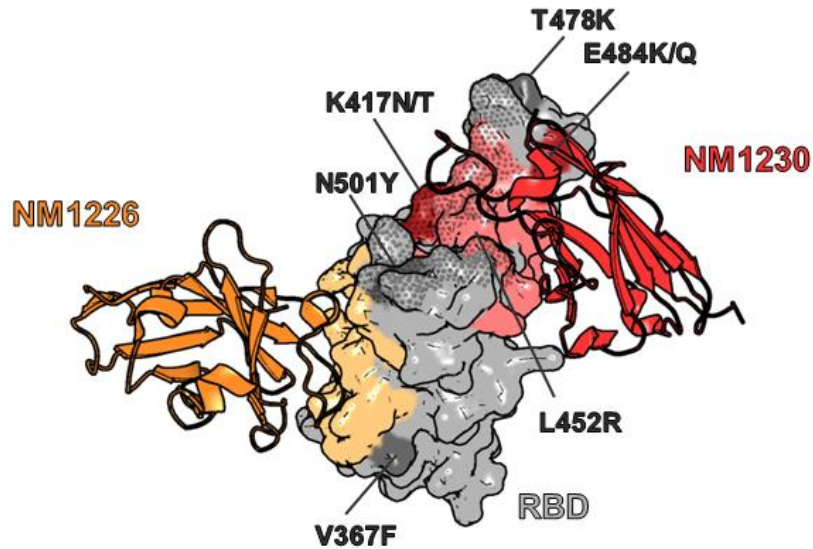

| Pangolin (WHO)    | RBD Mutation      |
|-------------------|-------------------|
| B.1.1.7 (Alpha)   | N501Y             |
| B.1.351 (Beta)    | K417N E484K N501Y |
| P1 (Gamma)        | K417T E484K N501Y |
| B.1.617.2 (Delta) | L452R T478K       |
| B.1.429 (Epsilon) | L452R             |
| P3 (Theta)        | E484K N501Y       |
| B.1.617.1 (Kappa) | L452R E484Q       |
| A.23.1            | V367F             |

505

506 **Supplementary Figure 2. Influence of RBD mutations on bipNb NM1267 binding**

507 NM1267-forming single Nbs, NM1226 (orange, PDB 7NKT) and NM1230 (red, PDB 7B27) are  
 508 shown as cartoon with their corresponding binding epitopes on the RBD surface in light orange  
 509 and light red, respectively. In addition, the ACE2 interaction site on RBD is illustrated as dotted  
 510 surface. Mutations on RBD of identified SARS-CoV-2 variants, including B.1.1.7 (Alpha),  
 511 B.1.351 (Beta), P1 (Gamma), A.1.617.2 (Delta), B.1.429 (Epsilon), P3 (Theta), B.1.617.1  
 512 (Kappa) and A.23.1 are highlighted in dark grey or dark red and labeled respectively.

513

514 **Supplementary Table 1. Nb combinations for bipNbs**

| <b>Biparatopic (Bip)/ bivalent Nb</b> | <b>Single Nb combination</b>                   |
|---------------------------------------|------------------------------------------------|
| NM1266                                | NM1230-(G <sub>4</sub> S) <sub>4</sub> -NM1228 |
| NM1267                                | NM1230-(G <sub>4</sub> S) <sub>4</sub> -NM1226 |
| NM1268                                | NM1228-(G <sub>4</sub> S) <sub>4</sub> -NM1226 |
| NM1251 (Control)                      | Pep-Nb-(G <sub>4</sub> S) <sub>4</sub> -Pep-Nb |

515

516

517 **Supplementary Table 2. Primer Sequences**

| Primer Name | Sequence 5'-3'                                                   |
|-------------|------------------------------------------------------------------|
| NM1230Nfor  | GGACGTCTCAACTCTCAAGTGCAGCTGGTGGAGTC                              |
| NM1230Nrev  | CACCACCGCCAGATCCACCGCCACCTGATCCTCCGCCTCCTGAGGACACGGTGACCTGGGCCC  |
| NM1228Cfor  | GGTGGATCTGGCGGTGGTGGAAAGTGGTGGCGGAGGTAGTGACGTGCAGCTGGTGGAAAT     |
| NM1228Nrev  | GGGGAATTCAGTGATGGTGTGGTGGTGTGAGGACACGGTGACCAGGGACCC              |
| NM1228Nfor  | GGACGTCTCAACTCTGACGTGCAGCTGGTGGAAAT                              |
| NM1228Nrev  | CACCACCGCCAGATCCACCGCCACCTGATCCTCCGCCTCCTGAGGACACGGTGACCAGGGACCC |
| NM1226Cfor  | GGTGGATCTGGCGGTGGTGGAAAGTGGTGGCGGAGGTAGTCAGGTGCAGCTGGTGGAAAT     |
| NM1226Crev  | GGGGAATTCAGTGATGGTGTGGTGGTGTGAGGACACGGTGACCAGGGGCC               |
| RBDfor      | ATATCTAGAGCCACCATGTTTCGTGTTTCTGG                                 |
| RBDrev      | AAGATCTGCTAGCTCGAGTCGC                                           |
| N501Yfor    | GGCTTTTCAGCCACATATGGCGTGGGCTATCAGC                               |
| N501Yrev    | CCACGCCATATGTGGGCTGAAAGCCGTAG                                    |
| L452Rfor    | GGCAACTACAATTACCGGTACCGGCTGTTCCGGAAG                             |
| L452Rrev    | CGGTACCGGTAATTGTAGTTGCCGCCG                                      |
| V367Ffor    | CGACTACTCCtTCCTGTACAACCTCCGCCAGCTTC                              |
| V367Frev    | CGGAGTTGTACAGGAAGGAGTAGTCGGCCACGCA                               |
| T478Kfor    | CCGGCAGCAAGCCTTGTAACGGCGTGGAAG                                   |
| T478Krev    | CGTTACAAGGctTGCTGCCGGCCTGATAGA                                   |
| E484Kfor    | GTAACGGCGTGaAAGGCTTCAACTGCTACTTCCC                               |
| E484Krev    | GCAGTTGAAGCCTTTCACGCCGTTACAAGGGGT                                |
| K417Nfor    | GACAGACAGGCAACATCGCCGACTACAACCTACAAGC                            |
| K417Nrev    | GTTGTAGTCGGCGATGTTGCCTGTCTGTCCAGGG                               |
| K417Tfor    | GACAGACAGGCACCATCGCCGACTACAACCTACAAG                             |
| K417Trev    | GTTGTAGTCGGCGATGGTGCCTGTCTGTCCAGGGG                              |

518

## 519 References

- 520 Beaudoin-Bussi eres G, Laumaea A, Anand SP, Pr evost J, Gasser R, Goyette G, Medjahed H,  
521 Perreault J, Tremblay T, Lewin A (2020) Decline of humoral responses against SARS-CoV-2  
522 spike in convalescent individuals. *MBio* 11
- 523 Becker M, Dulovic A, Junker D, Ruetalo N, Kaiser PD, Pinilla YT, Heinzl C, Haering J,  
524 Traenkle B, Wagner TR *et al* (2021) Immune response to SARS-CoV-2 variants of concern in  
525 vaccinated individuals. *Nature Communications* 12: 3109
- 526 Brouwer PJ, Caniels TG, van der Straten K, Snitselaar JL, Aldon Y, Bangaru S, Torres JL,  
527 Okba NM, Claireaux M, Kerster G (2020) Potent neutralizing antibodies from COVID-19  
528 patients define multiple targets of vulnerability. *Science* 369: 643-650
- 529 Cao Y, Su B, Guo X, Sun W, Deng Y, Bao L, Zhu Q, Zhang X, Zheng Y, Geng C (2020) Potent  
530 neutralizing antibodies against SARS-CoV-2 identified by high-throughput single-cell  
531 sequencing of convalescent patients' B cells. *Cell* 182: 73-84. e16
- 532 Challen R, Brooks-Pollock E, Read JM, Dyson L, Tsaneva-Atanasova K, Danon L (2021) Risk  
533 of mortality in patients infected with SARS-CoV-2 variant of concern 202012/1: matched cohort  
534 study. *bmj* 372
- 535 Chen P, Nirula A, Heller B, Gottlieb RL, Boscia J, Morris J, Huhn G, Cardona J, Mocherla B,  
536 Stosor V *et al* (2020) SARS-CoV-2 Neutralizing Antibody LY-CoV555 in Outpatients with  
537 Covid-19. *New England Journal of Medicine* 384: 229-237
- 538 Chi X, Liu X, Wang C, Zhang X, Li X, Hou J, Ren L, Jin Q, Wang J, Yang W (2020) Humanized  
539 single domain antibodies neutralize SARS-CoV-2 by targeting the spike receptor binding  
540 domain. *Nature communications* 11: 1-7
- 541 Dagan N, Barda N, Kepten E, Miron O, Perchik S, Katz MA, Hern an MA, Lipsitch M, Reis B,  
542 Balicer RD (2021) BNT162b2 mRNA Covid-19 vaccine in a nationwide mass vaccination  
543 setting. *New England Journal of Medicine* 384: 1412-1423
- 544 Davies NG, Abbott S, Barnard RC, Jarvis CI, Kucharski AJ, Munday JD, Pearson CAB, Russell  
545 TW, Tully DC, Washburne AD *et al* (2021a) Estimated transmissibility and impact of SARS-  
546 CoV-2 lineage B.1.1.7 in England. *Science* 372: eabg3055
- 547 Davies NG, Jarvis CI, van Zandvoort K, Clifford S, Sun FY, Funk S, Medley G, Jafari Y, Meakin  
548 SR, Lowe R *et al* (2021b) Increased mortality in community-tested cases of SARS-CoV-2  
549 lineage B.1.1.7. *Nature*
- 550 Diamond M, Chen R, Xie X, Case J, Zhang X, VanBlargan L, Liu Y, Liu J, Errico J, Winkler E  
551 (2021) SARS-CoV-2 variants show resistance to neutralization by many monoclonal and  
552 serum-derived polyclonal antibodies. *Research square*: rs. 3. rs-228079
- 553 Haga K, Takai-Todaka R, Matsumura Y, Takano T, Tojo T, Nagami A, Ishida Y, Masaki H,  
554 Tsuchiya M, Ebisudani T *et al* (2021) Nasal delivery of single-domain antibodies improves  
555 symptoms of SARS-CoV-2 infection in an animal model. *bioRxiv*: 2021.2004.2009.439147
- 556 Han X, Fan Y, Alwalid O, Li N, Jia X, Yuan M, Li Y, Cao Y, Gu J, Wu H (2021) Six-month  
557 follow-up chest CT findings after severe COVID-19 pneumonia. *Radiology* 299: E177-E186

- 558 Hanke L, Das H, Sheward DJ, Vidakovics LP, Urgard E, Moliner-Morro A, Karl V, Pankow A,  
559 Kim C, Smith NL *et al* (2021) A bispecific monomeric nanobody induces SARS-COV-2 spike  
560 trimer dimers. *bioRxiv*: 2021.2003.2020.436243
- 561 Hanke L, Perez LV, Sheward DJ, Das H, Schulte T, Moliner-Morro A, Corcoran M, Achour A,  
562 Hedestam GBK, Hällberg BM (2020) An alpaca nanobody neutralizes SARS-CoV-2 by  
563 blocking receptor interaction. *Nature communications* 11: 1-9
- 564 Huo J, Le Bas A, Ruza RR, Duyvesteyn HM, Mikolajek H, Malinauskas T, Tan TK, Rijal P,  
565 Dumoux M, Ward PN (2020) Neutralizing nanobodies bind SARS-CoV-2 spike RBD and block  
566 interaction with ACE2. *Nature structural & molecular biology* 27: 846-854
- 567 Jewell BL (2021) Monitoring differences between the SARS-CoV-2 B. 1.1. 7 variant and other  
568 lineages. *The Lancet Public Health*
- 569 Jiang S, Hillyer C, Du L (2020) Neutralizing antibodies against SARS-CoV-2 and other human  
570 coronaviruses. *Trends in immunology* 41: 355-359
- 571 Ju B, Zhang Q, Ge J, Wang R, Sun J, Ge X, Yu J, Shan S, Zhou B, Song S (2020) Human  
572 neutralizing antibodies elicited by SARS-CoV-2 infection. *Nature* 584: 115-119
- 573 Koenig P-A, Das H, Liu H, Kümmerer BM, Gohr FN, Jenster L-M, Schiffelers LD, Tesfamariam  
574 YM, Uchima M, Wuerth JD (2021) Structure-guided multivalent nanobodies block SARS-CoV-  
575 2 infection and suppress mutational escape. *Science* 371
- 576 Kustin T, Harel N, Finkel U, Perchik S, Harari S, Tahor M, Caspi I, Levy R, Leshchinsky M,  
577 Dror SK (2021) Evidence for increased breakthrough rates of SARS-CoV-2 variants of concern  
578 in BNT162b2-mRNA-vaccinated individuals. *Nature Medicine*: 1-6
- 579 Kwok KO, Lai F, Wei WI, Wong SYS, Tang JW (2020) Herd immunity—estimating the level  
580 required to halt the COVID-19 epidemics in affected countries. *Journal of Infection* 80: e32-  
581 e33
- 582 Li Q, Nie J, Wu J, Zhang L, Ding R, Wang H, Zhang Y, Li T, Liu S, Zhang M (2021) SARS-  
583 CoV-2 501Y. V2 variants lack higher infectivity but do have immune escape. *Cell* 184: 2362-  
584 2371. e2369
- 585 Long Q-X, Tang X-J, Shi Q-L, Li Q, Deng H-J, Yuan J, Hu J-L, Xu W, Zhang Y, Lv F-J (2020)  
586 Clinical and immunological assessment of asymptomatic SARS-CoV-2 infections. *Nature*  
587 *medicine* 26: 1200-1204
- 588 Madhi SA, Baillie V, Cutland CL, Voysey M, Koen AL, Fairlie L, Padayachee SD, Dheda K,  
589 Barnabas SL, Bhorat QE *et al* (2021) Efficacy of the ChAdOx1 nCoV-19 Covid-19 Vaccine  
590 against the B.1.351 Variant. *New England Journal of Medicine*
- 591 McCray Jr PB, Pewe L, Wohlford-Lenane C, Hickey M, Manzel L, Shi L, Netland J, Jia HP,  
592 Halabi C, Sigmund CD (2007) Lethal infection of K18-hACE2 mice infected with severe acute  
593 respiratory syndrome coronavirus. *Journal of virology* 81: 813-821
- 594 Muyldermans S (2013) Nanobodies: natural single-domain antibodies. *Annual review of*  
595 *biochemistry* 82: 775-797
- 596 Nambulli S, Xiang Y, Tilston-Lunel NL, Rennick LJ, Sang Z, Klimstra WB, Reed DS, Crossland  
597 NA, Shi Y, Duprex WP (2021) Inhalable Nanobody (PiN-21) prevents and treats SARS-CoV-2  
598 infections in Syrian hamsters at ultra-low doses. *Science Advances* 7: eabh0319



- 599 Planas D, Bruel T, Grzelak L, Guivel-Benhassine F, Staropoli I, Porrot F, Planchais C,  
600 Buchrieser J, Rajah MM, Bishop E (2021) Sensitivity of infectious SARS-CoV-2 B. 1.1. 7 and  
601 B. 1.351 variants to neutralizing antibodies. *Nature medicine*: 1-8
- 602 Ruetalo N, Businger R, Althaus K, Fink S, Ruoff F, Pogoda M, Iftner A, Ganzenmüller T,  
603 Hamprecht K, Flehmig B (2021) Antibody Response against SARS-CoV-2 and Seasonal  
604 Coronaviruses in Nonhospitalized COVID-19 Patients. *Mosphere* 6: e01145-01120
- 605 Schepens B, van Schie L, Nerinckx W, Roose K, Van Breedam W, Fijalkowska D, Devos S,  
606 Weyts W, De Cae S, Vanmarcke S *et al* (2021) Drug development of an affinity enhanced,  
607 broadly neutralizing heavy chain-only antibody that restricts SARS-CoV-2 in rodents. *bioRxiv*:  
608 2021.2003.2008.433449
- 609 Scudellari M (2020) How the pandemic might play out in 2021 and beyond. *Nature*: 22-25
- 610 Taylor A, Foo SS, Bruzzone R, Vu Dinh L, King NJ, Mahalingam S (2015) Fc receptors in  
611 antibody-dependent enhancement of viral infections. *Immunological reviews* 268: 340-364
- 612 Tegally H, Wilkinson E, Lessells RJ, Giandhari J, Pillay S, Msomi N, Mlisana K, Bhiman JN,  
613 von Gottberg A, Walaza S (2021) Sixteen novel lineages of SARS-CoV-2 in South Africa.  
614 *Nature Medicine* 27: 440-446
- 615 Tirado SMC, Yoon K-J (2003) Antibody-dependent enhancement of virus infection and  
616 disease. *Viral immunology* 16: 69-86
- 617 Traenkle B, Segan S, Fagbadebo FO, Kaiser PD, Rothbauer U (2020) A novel epitope tagging  
618 system to visualize and monitor antigens in live cells with chromobodies. *Scientific reports* 10:  
619 1-13
- 620 Volz E, Mishra S, Chand M, Barrett JC, Johnson R, Geidelberg L, Hinsley WR, Laydon DJ,  
621 Dabrera G, O'Toole A *et al* (2021) Assessing transmissibility of SARS-CoV-2 lineage B.1.1.7  
622 in England. *Nature* 593: 266-269
- 623 Wagner TR, Ostertag E, Kaiser PD, Gramlich M, Ruetalo N, Junker D, Haering J, Traenkle B,  
624 Becker M, Dulovic A *et al* (2021) NeutrobodyPlex-monitoring SARS-CoV-2 neutralizing  
625 immune responses using nanobodies. *EMBO Rep* 22: e52325
- 626 Wang P, Nair MS, Liu L, Iketani S, Luo Y, Guo Y, Wang M, Yu J, Zhang B, Kwong PD (2021)  
627 Antibody resistance of SARS-CoV-2 variants B. 1.351 and B. 1.1. 7. *Nature* 593: 130-135
- 628 Weinreich DM, Sivapalasingam S, Norton T, Ali S, Gao H, Bhore R, Musser BJ, Soo Y, Rofail  
629 D, Im J *et al* (2020) REGN-COV2, a Neutralizing Antibody Cocktail, in Outpatients with Covid-  
630 19. *New England Journal of Medicine* 384: 238-251
- 631 Winkler ES, Bailey AL, Kafai NM, Nair S, McCune BT, Yu J, Fox JM, Chen RE, Earnest JT,  
632 Keeler SP *et al* (2020) SARS-CoV-2 infection of human ACE2-transgenic mice causes severe  
633 lung inflammation and impaired function. *Nat Immunol* 21: 1327-1335
- 634 Wrapp D, De Vlieger D, Corbett KS, Torres GM, Wang N, Van Breedam W, Roose K, van  
635 Schie L, COVID V-C, Team R (2020) Structural basis for potent neutralization of  
636 betacoronaviruses by single-domain camelid antibodies. *Cell* 181: 1004-1015. e1015
- 637 Wu X, Cheng L, Fu M, Huang B, Zhu L, Xu S, Shi H, Zhang D, Yuan H, Nawaz W *et al* (2021)  
638 A potent bispecific nanobody protects hACE2 mice against SARS-CoV-2 infection via  
639 intranasal administration. *bioRxiv*: 2021.2002.2008.429275

- 640 Xiang Y, Nambulli S, Xiao Z, Liu H, Sang Z, Duprex WP, Schneidman-Duhovny D, Zhang C,  
641 Shi Y (2020) Versatile and multivalent nanobodies efficiently neutralize SARS-CoV-2. *Science*  
642 370: 1479-1484
- 643 Xie X, Muruato A, Lokugamage KG, Narayanan K, Zhang X, Zou J, Liu J, Schindewolf C, Bopp  
644 NE, Aguilar PV (2020) An infectious cDNA clone of SARS-CoV-2. *Cell host & microbe* 27: 841-  
645 848. e843
- 646 Yong SJ (2021) Long COVID or post-COVID-19 syndrome: putative pathophysiology, risk  
647 factors, and treatments. *Infectious Diseases*: 1-18
- 648 Zhou D, Dejnirattisai W, Supasa P, Liu C, Mentzer AJ, Ginn HM, Zhao Y, Duyvesteyn HM,  
649 Tuekprakhon A, Nutalai R (2021) Evidence of escape of SARS-CoV-2 variant B. 1.351 from  
650 natural and vaccine-induced sera. *Cell* 184: 2348-2361. e2346
- 651
